# Supplementary material for: Increasing Vaccination: Psychological Characteristics of COVID-19 Vaccine Advocates, Converts, and Resisters in Hong Kong
Source: MDPI journal article supplement (doi:10.3390/vaccines10101744), 2022-10-19
Supplement: s1 [file s1]

## Supplementary Information

### *Increasing vaccination: Psychological characteristics of COVID-19 vaccine advocates, converts, and resisters in Hong Kong*

## Supplementary Methods

### Sample Characteristics and Covariates

Sociodemographic characteristics for this study included gender, age, education, income, political leanings, residence, and health status. Women accounted for 57.5% of the sample. Age was measured on an 8-point scale ranging from 1 = 20 - 24 years old to 8 = over 55 years old ( $M = 5.14$ ,  $SD = 2.17$ ). These eight age ranges were then coded into four categories. In terms of residential areas, over half (51.03%) of respondents lived in New Territories, 31.71% were from Kowloon, and 17.3% were from Hong Kong Island (Supplementary Figure 1). Respondents were asked to report their highest education level on a 7-point scale with 1 = junior high school or below and 7 = doctorate ( $M = 4.09$ ,  $SD = 1.55$ ). Monthly household income was measured using a 7-point scale with 1 = HK\$10,000 or below and 7 = above HK\$60,000 ( $M = 4.81$ ,  $SD = 1.76$ ). Politically, 49.17% were apolitical, 19.19% were democrats, and 10.86% leaned pro-Beijing. In addition, respondents were asked to self-report their general perceptions of their own health from 1 = very poor to 7 = very good ( $M = 4.55$ ,  $SD = 1.06$ ). This variable was recoded to three conditions: good, moderate, and poor health status. Supplementary Table 1 shows the gender, age, and residence distributions of our sample compared to 2016 Hong Kong census data.<sup>1</sup>

Compared to the census data, our two-wave sample leaned more female ( $\chi^2 = 14.08$ ,  $p < .05$ ) and middle-aged ( $\chi^2 = 235.33$ ,  $p < .05$ ), with higher income ( $\chi^2 = 694.96$ ,  $p < .05$ ) and higher reported education levels ( $\chi^2 = 1384.26$ ,  $p < .05$ ).

**Table S1.** Comparison of sample demographics with Hong Kong census figures.

|               | Hong Kong 2016<br>Population By-<br>census | Wave 1 Study<br>( $n=3,190$ ) | Wave 2 Study<br>( $n=1,501$ ) |
|---------------|--------------------------------------------|-------------------------------|-------------------------------|
| <i>Gender</i> |                                            |                               |                               |
| Male          | 47%                                        | 43.4%                         | 42.5%                         |
| Female        | 53%                                        | 56.6%                         | 57.5%                         |
| <i>Age</i>    |                                            |                               |                               |
| 20-24         | 7.46%                                      | 9.2%                          | 3.70%                         |
| 25-29         | 7.91%                                      | 11.5%                         | 9.70%                         |
| 30-34         | 8.50%                                      | 13.0%                         | 14.10%                        |
| 35-39         | 8.38%                                      | 12.9%                         | 14.20%                        |

<sup>1</sup> <https://www.censtatd.gov.hk/hkstat/sub/sp459.jsp>

|                  |        |       |        |
|------------------|--------|-------|--------|
| 40-44            | 8.92%  | 11.8% | 14.90% |
| 45-49            | 9.22%  | 8.9%  | 10.10% |
| 50-54            | 10.70% | 12.0% | 10.70% |
| 55+              | 38.90% | 20.7% | 22.90% |
| <i>Residence</i> |        |       |        |
| Hong Kong Island | 17%    | 17.5% | 17.3%  |
| Kowloon          | 31%    | 32.1% | 31.7%  |
| New Territories  | 53%    | 50.4% | 51%    |

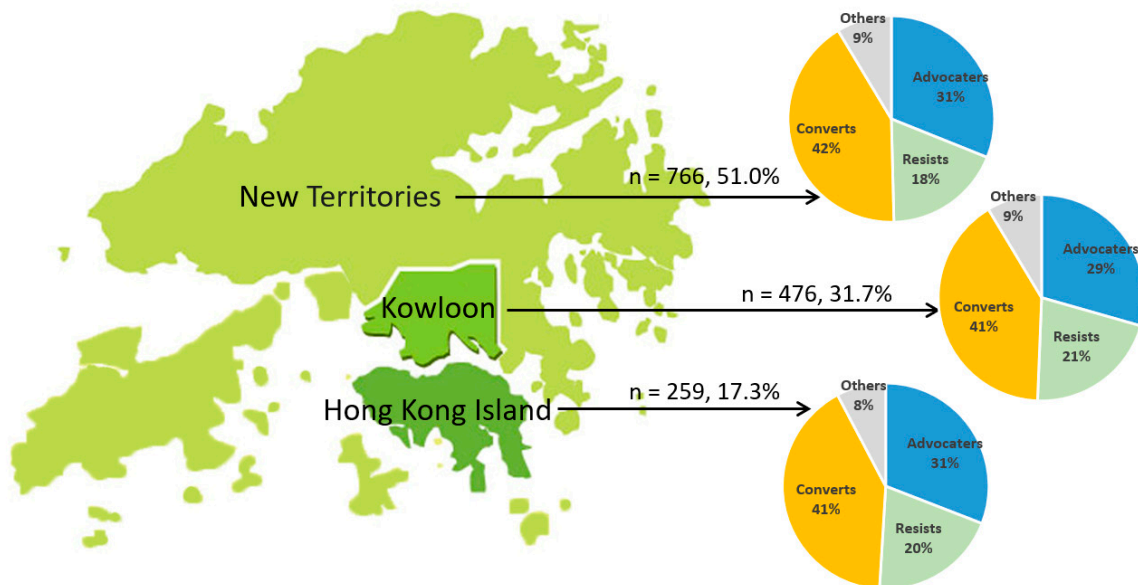

Figure S1. Geolocation distribution of our sample in Hong Kong.

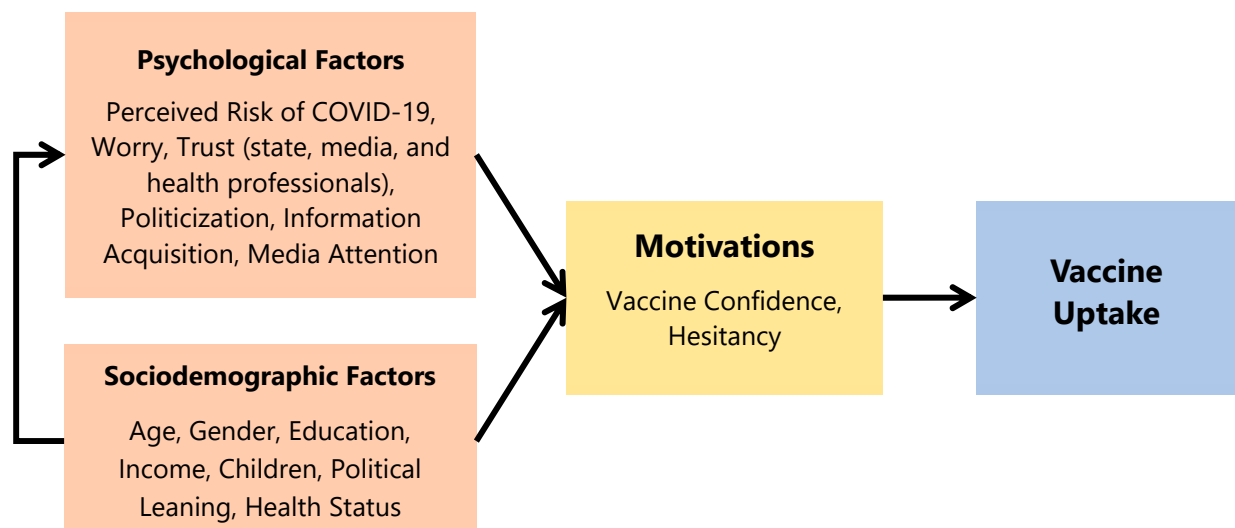

Figure S2. Theoretical framework

**Table S2.** Zero-order and partial associations for vaccine acceptance with psychosocial variables.

|                                 | <i>Mean (SD)</i> | [T2] Vaccine Risk Acceptance |                           | [T2] Vaccination        |             |
|---------------------------------|------------------|------------------------------|---------------------------|-------------------------|-------------|
|                                 |                  | <i>r</i>                     | Spearman <i>r</i> partial | Point-biserial <i>r</i> | AOR         |
| <b>Wave 1</b>                   |                  |                              |                           |                         |             |
| [T1] Politicization             | 4.93 (1.37)      | <b>-0.25</b>                 | <b>-0.20</b>              | <b>-0.14</b>            | <b>0.77</b> |
| [T1] Trust in State             | 3.67 (1.47)      | <b>0.40</b>                  | <b>0.35</b>               | <b>0.21</b>             | <b>1.48</b> |
| [T1] Trust in Media             | 4.10 (1.13)      | -0.03                        | 0.01                      | -0.05                   | 0.91        |
| [T1] Trust in Professionals     | 4.61 (1.16)      | 0.09                         | 0.07                      | 0.05                    | 1.08        |
| [T1] Perceived Risk             | 4.44 (1.04)      | -0.04                        | -0.04                     | -0.09                   | 0.83        |
| [T1] Worry                      | 4.74 (1.35)      | <b>-0.11</b>                 | <b>-0.07</b>              | -0.06                   | 0.90        |
| [T1] Information Acquisition    | 4.65 (0.97)      | <b>0.20</b>                  | <b>0.21</b>               | 0.09                    | 1.20        |
| [T1] Media Attention            | 3.67 (1.04)      | 0.07                         | 0.08                      | 0.00                    | 1.00        |
| [T1] Vaccine Confidence         | 3.99 (1.29)      | <b>0.37</b>                  | <b>0.33</b>               | <b>0.17</b>             | <b>1.33</b> |
| [T1] Intention to Vaccination   | 3.82 (1.41)      | <b>0.40</b>                  | <b>0.34</b>               | <b>0.21</b>             | <b>1.40</b> |
| <b>Wave 2 – Wave 1</b>          |                  |                              |                           |                         |             |
| [T2-T1] Politicization          | -0.04 (1.26)     | <b>0.13</b>                  | <b>0.13</b>               | -0.09                   | 1.17        |
| [T2-T1] Trust in State          | 0.15 (1.07)      | <b>0.11</b>                  | <b>0.11</b>               | 0.02                    | 1.05        |
| [T2-T1] Trust in Media          | -0.15 (1.25)     | <b>0.13</b>                  | <b>0.08</b>               | 0.05                    | 1.09        |
| [T2-T1] Trust in Professionals  | -0.09 (1.29)     | <b>0.21</b>                  | <b>0.18</b>               | 0.07                    | 1.13        |
| [T2-T1] Perceived Risk          | -0.10 (1.00)     | <b>0.15</b>                  | <b>0.10</b>               | <b>0.11</b>             | <b>1.29</b> |
| [T2-T1] Worry                   | -0.08 (1.33)     | 0.09                         | 0.07                      | 0.03                    | 1.06        |
| [T2-T1] Information Acquisition | -0.39 (1.05)     | 0.09                         | 0.06                      | 0.07                    | 1.14        |
| [T2-T1] Media Attention         | -0.19 (1.06)     | 0.06                         | 0.04                      | 0.04                    | 1.08        |
| [T2-T1] Vaccine Confidence      | 0.23 (1.51)      |                              |                           | <b>0.29</b>             | <b>1.60</b> |

Note. [T1] = variables measured at wave 1, [T2] = variables measured at wave 2, [T2-T1] = changes between wave 2 and wave 1. “Trust in Professionals” refers to trust in healthcare professionals. To avoid capitalizing on chance, p-values are not presented. Given that this study was designed to detect small to medium effects over a one-year period, correlations > 0.1 are assumed to be non-trivial. Partial correlations and adjusted odds ratios are presented, with controls for wave 1 age, gender, education, and income.

**Table S3.** Multiple linear regression and binominal logistic regression explaining vaccine risk acceptance and vaccination status at wave 2.

|                              | [T2] Vaccine Risk Acceptance |                 | [T2] Vaccination |                    |
|------------------------------|------------------------------|-----------------|------------------|--------------------|
|                              | (s.e.)                       | <i>p</i> -value | AOR              | 95% CIs            |
| Intercept                    | <b>1.98 (0.32)</b>           | 0.000           | 0.07             | [0.01, 0.31]       |
| [T1] Politicization          | 0.02 (0.03)                  | 0.37            | 1.03             | [0.87 1.21]        |
| [T1] Trust in state          | <b>0.39 (0.04)</b>           | 0.000           | 0.97             | [0.80 1.18]        |
| [T1] Trust in media          | <b>-0.15 (0.03)</b>          | 0.000           | <b>0.81</b>      | <b>[0.67 0.99]</b> |
| [T1] Trust in professionals  | <b>0.10 (0.03)</b>           | 0.001           | 0.92             | [0.76 1.12]        |
| [T1] Perceived risk          | -0.04 (0.04)                 | 0.15            | 1.02             | [0.83 1.26]        |
| [T1] Worry                   | 0.03 (0.03)                  | 0.34            | 0.94             | [0.78 1.14]        |
| [T1] Information Acquisition | 0.01 (0.03)                  | 0.88            | 1.13             | [0.90 1.41]        |
| [T1] Media Attention         | 0.01 (0.03)                  | 0.86            | 0.97             | [0.80 1.17]        |

|                                 |                     |                           |                                  |                    |
|---------------------------------|---------------------|---------------------------|----------------------------------|--------------------|
| [T2-T1] Politicization          | 0.04 (0.03)         | 0.13                      | 1.14                             | [0.98 1.32]        |
| [T2-T1] Trust in state          | <b>0.25 (0.03)</b>  | 0.000                     | 0.86                             | [0.71 1.06]        |
| [T2-T1] Trust in media          | <b>-0.07 (0.03)</b> | 0.01                      | 0.89                             | [0.76 1.05]        |
| [T2-T1] Trust in Professionals  | <b>0.10 (0.03)</b>  | 0.002                     | 0.84                             | [0.71 1.00]        |
| [T2-T1] Perceived risk          | 0.04 (0.02)         | 0.15                      | 1.19                             | [0.96 1.33]        |
| [T2-T1] Worry                   | 0.01 (0.03)         | 0.78                      | 0.90                             |                    |
| [T2-T1] Information Acquisition | -0.01 (0.03)        | 0.61                      | 1.16                             | [0.96 1.39]        |
| [T2-T1] Media Attention         | 0.03 (0.03)         | 0.35                      | 1.00                             | [0.84 1.19]        |
| [T1] Risk Acceptance            | <b>0.23 (0.02)</b>  | 0.000                     | <b>2.75</b>                      | <b>[2.16 3.52]</b> |
| [T2-T1] Vaccine Confidence      |                     |                           | <b>3.16</b>                      | <b>[2.71 3.70]</b> |
| [T1] Vaccination Intention      |                     |                           | 1.13                             | [0.95 1.36]        |
|                                 |                     | $R^2 = 37.1\%, p < 0.001$ | $Pseudo R^2 = 28.6\%, p < 0.001$ |                    |

**Supplementary Table S4.** The Measurement Scale.

|                                                                                                                                                                                                                                                                                                                                                                                                                                                                                                                                                                                                                              |
|------------------------------------------------------------------------------------------------------------------------------------------------------------------------------------------------------------------------------------------------------------------------------------------------------------------------------------------------------------------------------------------------------------------------------------------------------------------------------------------------------------------------------------------------------------------------------------------------------------------------------|
| <b>Measurements</b>                                                                                                                                                                                                                                                                                                                                                                                                                                                                                                                                                                                                          |
| <p><b>Vaccination Intention (Wave 1 Only)</b></p> <p>If the disease control and prevention authorities developed a vaccine to deal with COVID-19, how likely would you be to take the following actions? 如果現在疾病防控部門研發出新型冠狀病毒肺炎的疫苗，您有多大可能採取以下行動？</p> <p>(1) I would get the vaccine sometime soon. 我會在最近幾天接種疫苗</p> <p>(2) If I were faced with the decision of whether to get the vaccine today, I would choose to get it. 如果今天必須作出決定是否接種疫苗，我會進行接種</p> <p>(3) I would get the vaccine in the future. 我會在未來接種疫苗</p>                                                                                                            |
| <p><b>Vaccination Status (Wave 2 Only)</b></p> <p>What is your COVID-19 vaccination status? 目前為止您的新冠疫苗接種情況是？</p> <p>(1) I don't plan to receive the vaccine. 沒計畫接種疫苗</p> <p>(2) I have scheduled to be vaccinated but not yet vaccinated. 已經預約接種疫苗但還未接種</p> <p>(3) I have had my first shot of the vaccine. 已接種第一針疫苗</p> <p>(4) I have had my first shot of the vaccine (only one-shot required, e.g., J&amp;J vaccine). 已接種第一針疫苗（只需接種一針，如強生疫苗）</p> <p>(5) I've had my first dose of the vaccine and don't plan to get the second dose. 已接種第一針疫苗，且不打算接種第二針</p> <p>(6) I have had my second shot of the vaccine. 已接種第二針疫苗</p> |
| <p><b>Vaccine Confidence</b></p> <p>To what extent do you agree with the following statements regarding the COVID-19 vaccines? 對於接種新冠疫苗，您有多大程度同意以下各項描述？</p> <p>(1) I can accept the potential risks of the vaccine. 我可以接受接種疫苗存在的風險</p> <p>(2) I am highly willing to accept the potential risks of the vaccine. 我對接種疫苗存在的風險接受程度</p> <p>(3) After careful deliberation, I think the vaccine does more good than harm. 經過仔細考慮，我認為接種疫苗利大於弊</p>                                                                                                                                                                                  |
| <p><b>Perceived Risk</b></p> <p>With respect to the risk that arises from COVID-19, how much do you agree with the following statements? 對於 2019 冠狀病毒帶來的風險，您有多大程度同意以下各項描述？</p>                                                                                                                                                                                                                                                                                                                                                                                                                                               |

- (1) The coronavirus is almost ubiquitous, and the pathogenicity is high. 該病毒幾乎無處不在, 很容易染病
- (2) There is a high probability of getting infected. 感染機會很大
- (3) The mortality rate of COVID-19 is high. 染病的死亡率很高
- (4) I have no confidence I can avoid the negative impacts of COVID-19. 我沒有把握避開該風險帶來的負面影響

#### **Worry**

With respect to the risk that arises from COVID-19, how much do you agree with the following statements? 對於 2019 冠狀病毒帶來的風險, 您有多大程度同意以下各項描述?

- (1) I feel fearful. 我感到害怕
- (2) I feel sad. 我感到悲傷
- (3) I feel helpless. 我感到無助
- (4) I feel worried. 我感到擔心

#### **Trust in State**

How much do you trust the following institutions/people? 您有多大程度信任以下機構或人員?

- (1) State government 特區政府
- (2) The Food and Health Bureau 食物及衛生局
- (3) The Center for Health Protection 衛生防護中心

#### **Trust in Media**

How much do you trust the following institutions/people? 您有多大程度信任以下機構或人員?

- (1) Hong Kong media 香港媒體

#### **Trust in Public Health Professionals**

How much do you trust the following institutions/people? 您有多大程度信任以下機構或人員?

- (1) Public health professionals 相關醫療專家

#### **Information Acquisition**

How long do you use the following media channels on average per day? 您平均每天使用多長時間在以下媒體渠道?

- (1) Television 電視
- (2) Newspapers 報紙
- (3) Websites (e.g., Yahoo) 網站 (如雅虎等)
- (4) Social media (e.g., WhatsApp, Facebook) 社交媒體 (如 WhatsApp, Facebook 等)
- (5) Short video platforms (e.g., Tik Tok) 短視頻平台 (如 Tik Tok 等)

#### **Media Attention**

How often do you pay attention to information about COVID-19 when using the following media channels? 請問您通過以下方法關注 2019 冠狀病毒肺炎資訊的程度是?

- (1) Television 電視
- (2) Newspapers 報紙
- (3) Websites (e.g., Yahoo) 網站 (如雅虎等)
- (4) Social media (e.g., WhatsApp, Facebook) 社交媒體 (如 WhatsApp, Facebook 等)
- (5) Short video platforms (e.g., Tik Tok) 短視頻平台 (如 Tik Tok 等)

**Issue Politicization**

With respect to COVID-19, how much do you agree with the following statements? 提及 2019 冠狀病毒肺炎事件，您有多大程度同意以下各項描述？

- (1) It is too mixed up in politics. 有關事件的發展與政治因素密不可分
- (2) Due to political interests, policy decisions have favored some groups. 相關決策因政治利益偏袒了某些團體
- (3) It is politically motivated. 有關事件的處理存在政治動機
- (4) Political considerations affect the nature of the information that the public receives about this issue. 政治因素影響了公眾所接收到的資訊內容
